# Supplementary material for: Efficient Gene Expression in Human Stem Cell Derived-Cortical Organoids Using Adeno Associated Virus
Source: MDPI journal article supplement (doi:10.3390/cells11203194), 2022-10-11
Supplement: s1 [file s1]

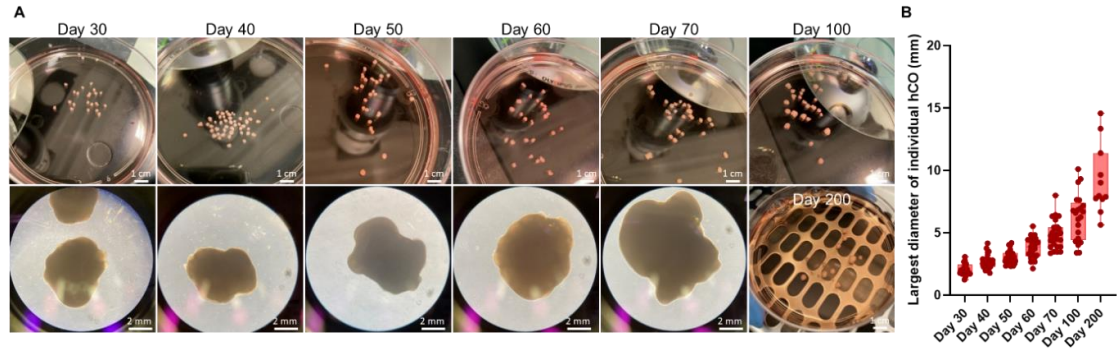

**Figure S1. Generation of human cortical organoid.** (A) Bright-field images of hCOs at day 30, 40, 50, 60, 70, and 100. Scale bar is 1cm (top panel) and 2 mm (bottom panel) (B) Quantification of diameter of cortical organoids at day 30, 40, 50, 60, 70, 100, and 200.

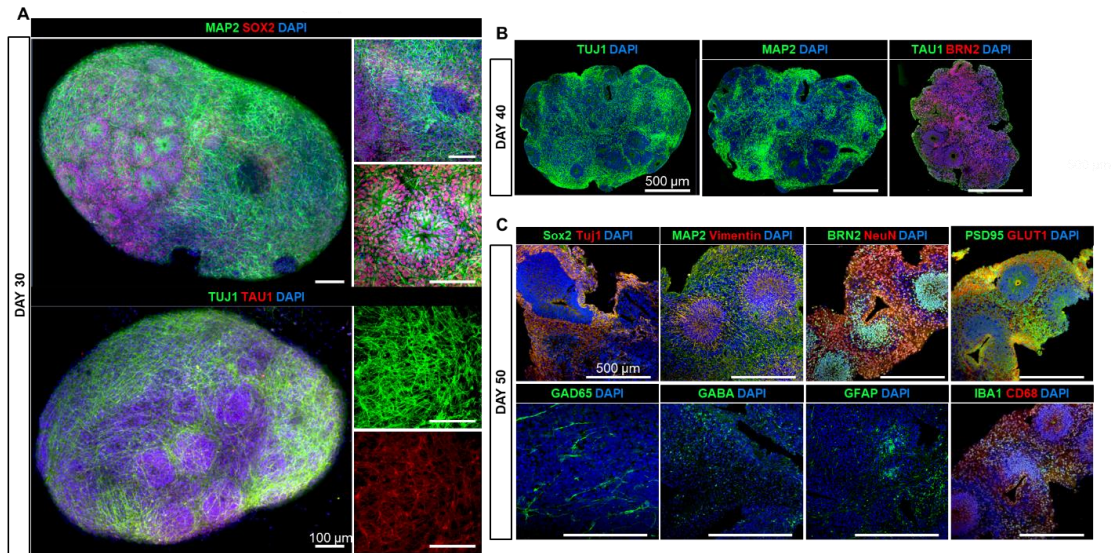

**Figure S2. Immunostaining of cortical organoid.** (A) Whole mount staining of hCOs at day 30. Stemness marker (SOX2), microtubule marker (TAU1) and neuronal markers (TUJ1, MAP2) were expressed. Scale bar is 100  $\mu$ m. (B) Paraffin sectioned immunohistochemical staining of hCOs at day 40. The neuronal (TUJ1, MAP2), microtubule (TAU1) and cortical layer (BRN2) markers were present at this stage. Scale bar is 500  $\mu$ m. (C) Paraffin sectioned immunohistochemical staining of hCOs at day 50. The stemness (SOX2), neuronal (TUJ1, MAP2, NeuN), radial glial (VIM), cortical layer (BRN2), post-synaptic (PSD95), excitatory (GLUT1) and inhibitory neurons (GAD65, GABA), astrocyte (GFAP) and microglial (IBA1, CD68) markers were present at this stage. Scale bar is 500  $\mu$ m.

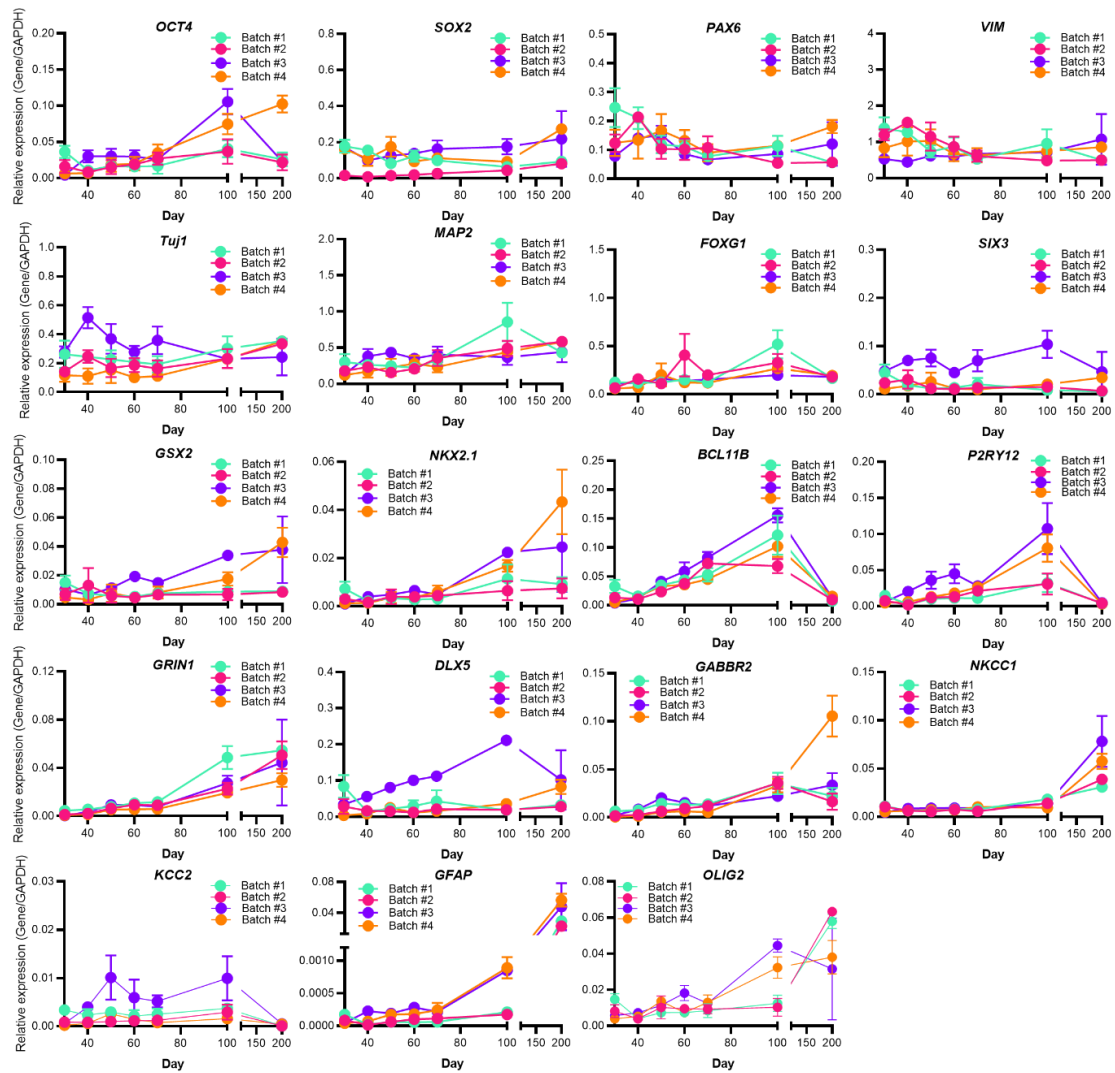

**Figure S3. Gene expression profile of human cortical organoids.** The qRT-PCR data of day 30, 40, 50, 60, 70, 100, and 200 day-old cortical organoid. To show reliable production of cortical organoid, 4 separate batches of cortical organoids are used for analysis. Gene expression profile showed relative expression of OCT4, SOX2, PAX6, VIM, TUJ1, MAP2, FOXG1, SIX3, GSX2, NKX2.1, BCL11B, P2RY12, GRIN1, DLX5, GABBR2, NKCC1, KCC2, GFAP, and OLIG2 compared to house-keeping gene (GAPDH).

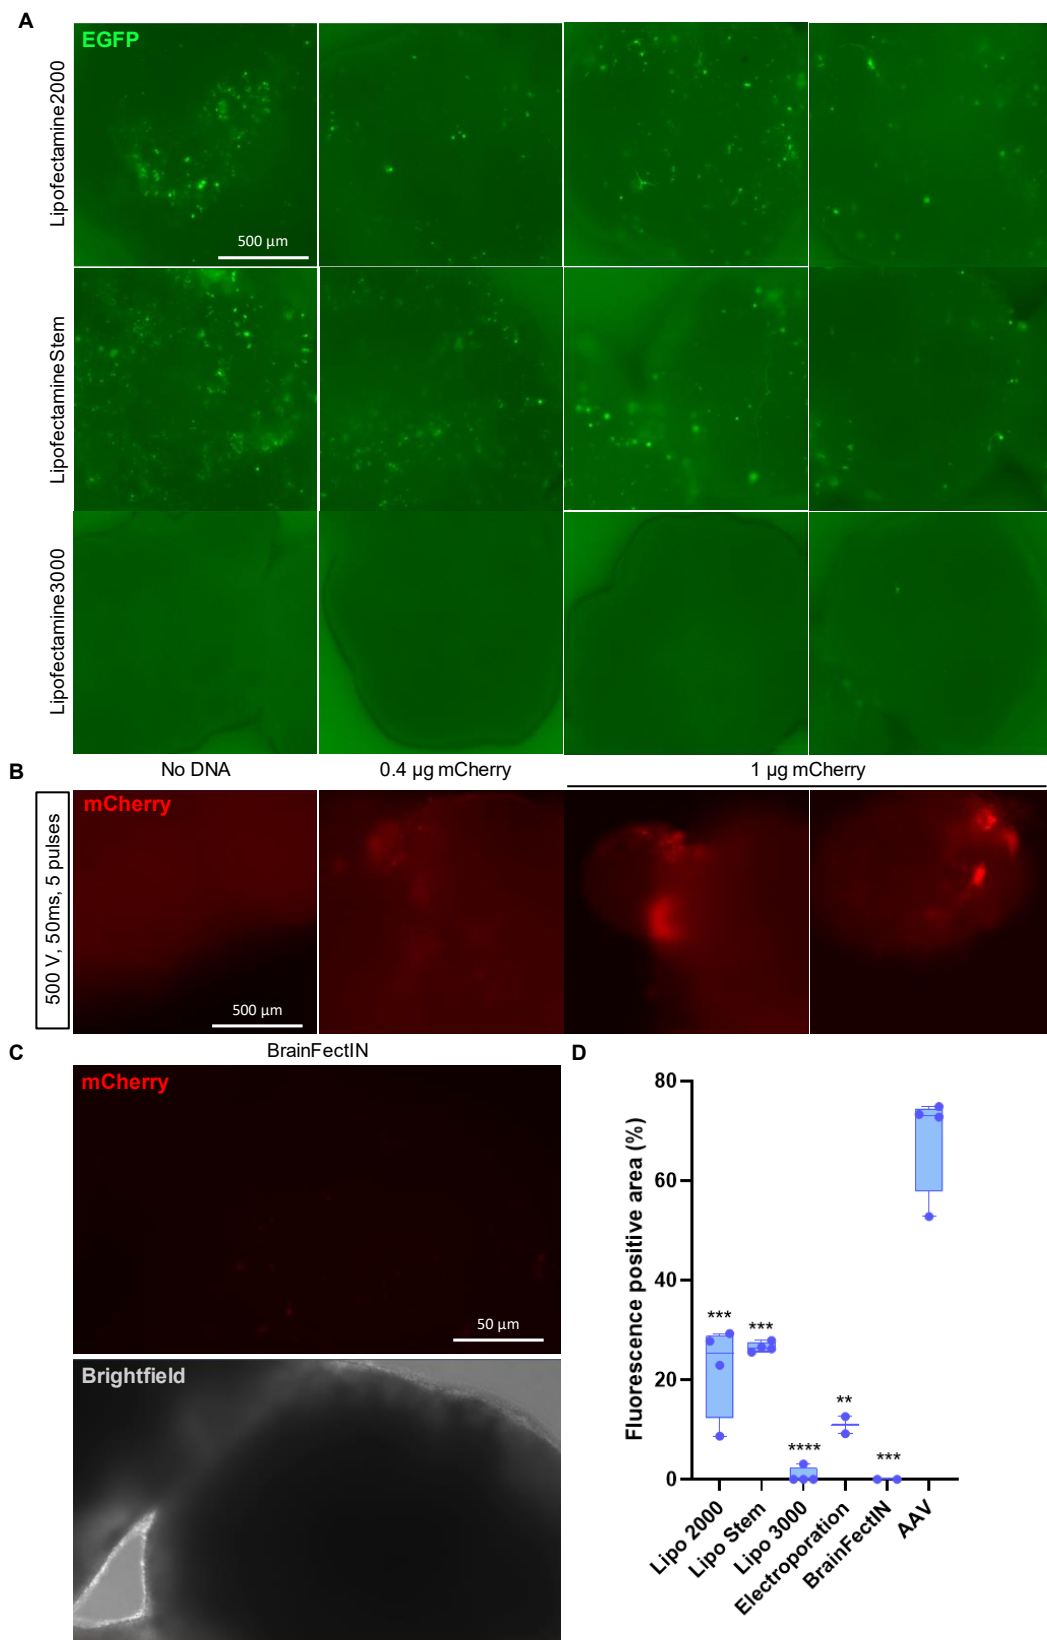

**Figure S4. Other gene delivery methods tested in human cortical organoids.** (A) Different lipofectamine (2000, Stem and 3000) were tested on day 30-old hCOs to express GFP. Scale bar is 500  $\mu$ m. (B) Electroporation of a mCherry-expressing plasmid at different concentration (control, i.e., no DNA, 0.4  $\mu$ g and 1  $\mu$ g). Scale bar is 500  $\mu$ m. (C) Transfection with BrainFectIN reagent of a mCherry-expressing plasmid. Scale bar is 50  $\mu$ m. (D) Quantification of fluorescent-positive area per organoid in different gene delivery methods

including lipofectamine (2000, stem and 3000), electroporation and BrainFectIN (\*\*  $p < 0.005$ , \*\*\*  $p < 0.001$  vs. AAV and \*\*\*\*  $p < 0.0001$  vs. AAV).

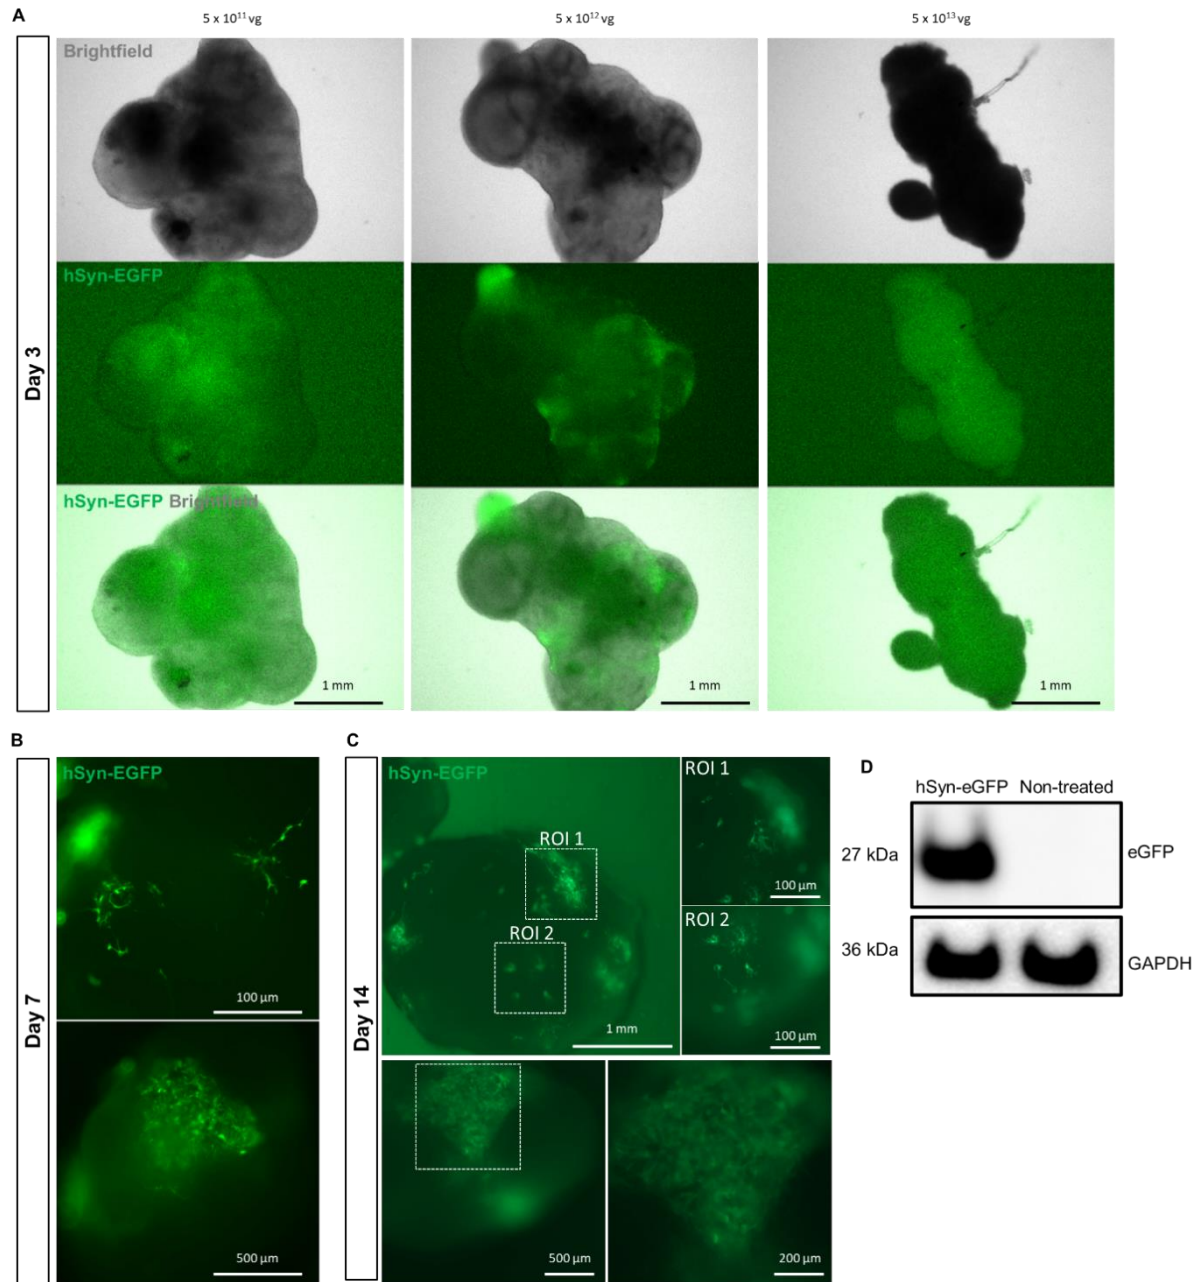

**Figure S5. Optimization of AAV titer on cortical organoid.** (A)  $5 \times 10^{11}$ ,  $5 \times 10^{12}$  and  $5 \times 10^{13}$  vg of AAV pSyn-EGFP added to day 30-old cortical organoids and fluorescence expression was analysed 3 days thereafter. Scale bar is 1 mm. Further analysis of  $5 \times 10^{12}$  vg AAV-treated cortical organoid (B) at day 7 and (C) day 14 were performed. Scale bars as shown in figure. (D) Western blot analysis of AAV-treated cortical organoid using optimized AAV titre with EGFP antibody (anti-eGFP, GAPDH for housekeeping).

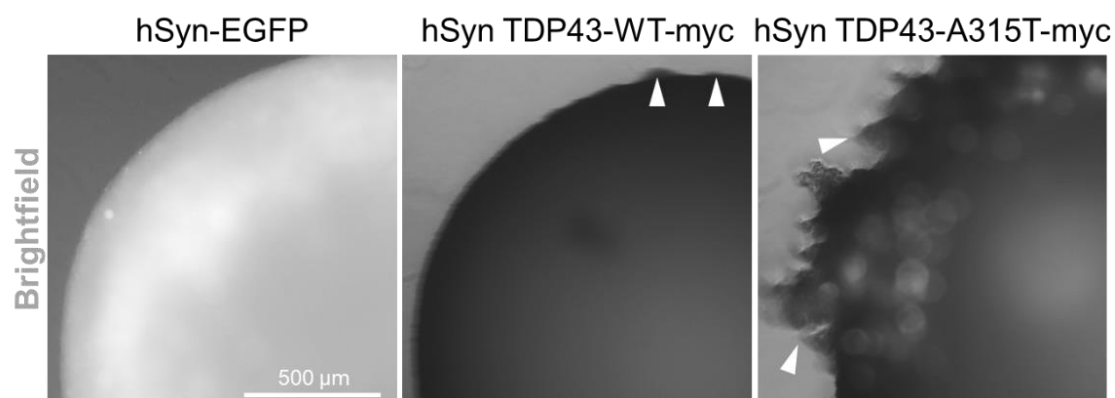

**Figure S6.** Toxicity in hCOs treated with TDP-43 AAV. The hCOs were treated with hSyn-EGFP, hSyn TDP43-WT-myc and hSyn TDP43-A315T-myc AAVs displayed morphological disruption (arrowheads).

**Video S1. Neuronal network activity in human cortical organoid.** Videos of AAV-mediated expression of the calcium indicator jRCaMP7 under the human synapsin promoter for control (aCSF), glutamate, gabazine and TTX treated cortical organoids. Videos have been uploaded to Zenodo (<https://doi.org/10.5281/zenodo.7080334>).

**Table S1.** Antibody for Immunocytochemistry.

| Type     | Host    | Supplier          | Catalog # | Dilution Ratio |
|----------|---------|-------------------|-----------|----------------|
| TUJ1     | Mouse   | Sigma-Aldrich     | T8578     | 1:200          |
| TUJ1     | Rabbit  | Covance           | PRB-435P  | 1:500          |
| TAU1     | Mouse   | Chemicon          | MAB3420   | 1:500          |
| SOX2     | Rabbit  | Chemicon          | AB5603    | 1:200          |
| MAP2     | Chicken | Abcam             | ab5392    | 1:500          |
| BRN2     | Rabbit  | Abcam             | Ab94977   | 1:500          |
| Vimentin | Mouse   | Proteintech Group | 65039     | 1:200          |
| NeuN     | Mouse   | Chemicon          | MAB377    | 1:500          |
| PSD95    | Rat     | Chemicon          | MAB1596   | 1:500          |
| GLUT1    | Rabbit  | Chemicon          | 07-1401   | 1:500          |
| GAD65    | Mouse   | Abcam             | Ab26113   | 1:500          |
| GABA     | Rabbit  | Sigma-Aldrich     | A2052     | 1:500          |
| GFAP     | Mouse   | Sigma-Aldrich     | G3893     | 1:500          |
| IBA1     | Goat    | Abcam             | Ab5076    | 1:500          |
| CD68     | Rat     | Bio-Rad           | MCA19957T | 1:100          |
| Myc      | Rabbit  | Abcam             | Ab9106    | 1:500          |

**Table S2.** Primer list for qRT-PCR.

| Type   | F Primer                 | R Primer                    |
|--------|--------------------------|-----------------------------|
| OCT4   | CAGTGCCCGAAACCCACAC      | GGAGACCCAGCAGCCTCAAA        |
| SOX2   | TTCACATGTCCCAGCACTACCAGA | TCACATGTGTGAGAGGGGCGAGTGTGC |
| PAX6   | TGGGCAGGTATTACGAGACTG    | ACTCCCGCTTATACTGGGCTA       |
| VIM    | CTCCGGGAGAAATTGCAGGA     | TTCAAGGTCAA GACGTGCCA       |
| Tuj1   | GGCCTTTGGACATCTCTTC      | CTCCGTGTAGTGACCCTTG         |
| MAP    | GAGAATGGGATCAACGGAGA     | CTGCTACAGCCTCAGCAGTG        |
| FOXG1  | AACCTGTGTTGCGCAAATGC     | AAACACGGGCATATGACCAC        |
| SIX3   | AGCAGAAGACGCATTGCTTC     | ACCAGTTGCCTACTTGTGTG        |
| GSX2   | ATGTCGCGCTCCTTCTATGTC    | ATGCCAAGCGGGATGAAGAAA       |
| NKX2.1 | AGCACACGACTCCGTTCTC      | GCCCACTTTCTTGTAGCTTTCC      |

|        |                         |                        |
|--------|-------------------------|------------------------|
| NKCC1  | TAAAGGAGTCGTGAAGTTTGGC  | CTTGACCCACAATCCATGACA  |
| KCC2   | AGGAAAGCAGTCCCTTCATCA   | GCCTCTTCATGCTCCCTACTT  |
| GRIN1  | CGTGAGTCCAAGGCAGAGAA    | TCTTTCGCCTCCATCAGCAG   |
| DLX5   | TTCCAAGCTCCGTTCAGAC     | GAATCGGTAGCTGAAGACTCG  |
| P2RY12 | TTTGTGTGTCAAGTTACCTCCG  | CTGGTGGTCTTCTGGTAGCG   |
| BCL11B | GGTGCCTGCTATGACAAGG     | GGCTCGGACACTTTCCTGAG   |
| GFAP   | GAGAACCGGATCACCATTCC    | CCCAGTCTGGAGCAACCTAC   |
| OLIG2  | AGGACAAGAAGCAAATGACAG   | TCCATGGCGATGTTGAGG     |
| GABBR  | ACCAACTTCTTCGGGGTCAC    | CACCTCCCTGCTGTCTTGAA   |
| GAPDH  | CATGAGAAGTATGACAACAGCCT | AGTCCTTCCACGATACCAAAGT |
